# Supplementary material for: Comprehensive infectious disease screening in a cohort of unaccompanied refugee minors in Germany from 2016 to 2017: A cross-sectional study
Source: PLOS journal article supplement (doi:10.1371/journal.pmed.1003076), 2020-03-31
Supplement: S2 (10.1371/journal.pmed.1003076.s002) [file journal.pmed.1003076.s002]

To:  
[Name]  
[Address]

[Location], [Date]

Regarding:  
[Patient first and FAMILY NAME], born on [Date]  
residing at [Address]

To whom it may concern,

We would like to report on the health status of [Patient name], an unaccompanied refugee minor.  
During our medical appointment on [Date], [Translator's name] provided translation services.

### Patient profile

|                                                                                                                                                                                                                                                                                                                                                                                                                                                                                                                                                                                                                                                                                                                  |                  |                                                     |                  |
|------------------------------------------------------------------------------------------------------------------------------------------------------------------------------------------------------------------------------------------------------------------------------------------------------------------------------------------------------------------------------------------------------------------------------------------------------------------------------------------------------------------------------------------------------------------------------------------------------------------------------------------------------------------------------------------------------------------|------------------|-----------------------------------------------------|------------------|
| Name*:                                                                                                                                                                                                                                                                                                                                                                                                                                                                                                                                                                                                                                                                                                           | (*as registered) | Date of birth*:                                     | (*as registered) |
| Additional names provided (if applicable):                                                                                                                                                                                                                                                                                                                                                                                                                                                                                                                                                                                                                                                                       |                  | Additional dates of birth provided (if applicable): |                  |
| Gender:                                                                                                                                                                                                                                                                                                                                                                                                                                                                                                                                                                                                                                                                                                          |                  | Arrival in Germany on (Date):                       |                  |
| When left country of origin:                                                                                                                                                                                                                                                                                                                                                                                                                                                                                                                                                                                                                                                                                     |                  | Migration route:                                    |                  |
| Country of origin: [ Select ] .... or if necessary, enter other:                                                                                                                                                                                                                                                                                                                                                                                                                                                                                                                                                                                                                                                 |                  |                                                     |                  |
| In the event of having lived in other/additional countries, then where and for how long:                                                                                                                                                                                                                                                                                                                                                                                                                                                                                                                                                                                                                         |                  |                                                     |                  |
| Languages: <input type="checkbox"/> German <input type="checkbox"/> English <input type="checkbox"/> French <input type="checkbox"/> Italian <input type="checkbox"/> Albanian <input type="checkbox"/> Russian<br><input type="checkbox"/> Arabic <input type="checkbox"/> Kurdish <input type="checkbox"/> Farsi <input type="checkbox"/> Tigrinya <input type="checkbox"/> Wolof <input type="checkbox"/> Somali<br><input type="checkbox"/> Fula <input type="checkbox"/> Oromo <input type="checkbox"/> Krio <input type="checkbox"/> Mandinka <input type="checkbox"/> Pular <input type="checkbox"/> Amharic<br><input type="checkbox"/> Dioula <input type="checkbox"/> Jola Additional/other languages: |                  |                                                     |                  |
| Patient's favorite activities, job aspirations:                                                                                                                                                                                                                                                                                                                                                                                                                                                                                                                                                                                                                                                                  |                  |                                                     |                  |
| Further patient profile notes:                                                                                                                                                                                                                                                                                                                                                                                                                                                                                                                                                                                                                                                                                   |                  |                                                     |                  |

### Medical history

|                                      | No                       | Yes                      |
|--------------------------------------|--------------------------|--------------------------|
| Coughing for over 2 weeks?           | <input type="checkbox"/> | <input type="checkbox"/> |
| Unexplained weight loss?             | <input type="checkbox"/> | <input type="checkbox"/> |
| Chronic illnesses?                   | <input type="checkbox"/> | <input type="checkbox"/> |
| Prior operations or accidents?       | <input type="checkbox"/> | <input type="checkbox"/> |
| Allergies?                           | <input type="checkbox"/> | <input type="checkbox"/> |
| Sleep disturbances?                  | <input type="checkbox"/> | <input type="checkbox"/> |
| Regular medications taken?           | <input type="checkbox"/> | <input type="checkbox"/> |
| Past medical treatments?             | <input type="checkbox"/> | <input type="checkbox"/> |
| Known diseases in family history?    | <input type="checkbox"/> | <input type="checkbox"/> |
| Smoking, alcohol or drug dependency? | <input type="checkbox"/> | <input type="checkbox"/> |
| Vaccination documentation available? | <input type="checkbox"/> | <input type="checkbox"/> |
| Current diseases and/or complaints:  |                          |                          |

## Clinical findings

|                                               |                          |                          |                                             |                                 |                          |                          |
|-----------------------------------------------|--------------------------|--------------------------|---------------------------------------------|---------------------------------|--------------------------|--------------------------|
| Age*: [ ] years + [ ] months (*as registered) |                          |                          | Blood pressure [right/left] upper arm: mmHg |                                 |                          |                          |
| Weight: kg                                    |                          |                          | Pulse: /min.                                |                                 |                          |                          |
| Height: cm                                    |                          |                          | Temperature: °C                             |                                 |                          |                          |
|                                               | normal                   | patho-logical            |                                             |                                 | normal                   | patho-logical            |
| General appearance:                           | <input type="checkbox"/> | <input type="checkbox"/> |                                             | Lungs (incl. respiratory rate): | <input type="checkbox"/> | <input type="checkbox"/> |
| Nutritional status:                           | <input type="checkbox"/> | <input type="checkbox"/> |                                             | Abdomen:                        | <input type="checkbox"/> | <input type="checkbox"/> |
| Skin:                                         | <input type="checkbox"/> | <input type="checkbox"/> |                                             | Size of liver and spleen:       | <input type="checkbox"/> | <input type="checkbox"/> |
| — Scabies:                                    | <input type="checkbox"/> | <input type="checkbox"/> |                                             | Spine:                          | <input type="checkbox"/> | <input type="checkbox"/> |
| Ear, nose & throat:                           | <input type="checkbox"/> | <input type="checkbox"/> |                                             | Extremities:                    | <input type="checkbox"/> | <input type="checkbox"/> |
| Eyes:                                         | <input type="checkbox"/> | <input type="checkbox"/> |                                             | Neurological status:            | <input type="checkbox"/> | <input type="checkbox"/> |
| Dental status / cavities:                     | <input type="checkbox"/> | <input type="checkbox"/> |                                             | Psychological state (cursory):  | <input type="checkbox"/> | <input type="checkbox"/> |
| Heart:                                        | <input type="checkbox"/> | <input type="checkbox"/> |                                             | Other (1): [Description]        | <input type="checkbox"/> | <input type="checkbox"/> |
| Genitals:                                     | <input type="checkbox"/> | <input type="checkbox"/> |                                             | Other (2): [Description]        | <input type="checkbox"/> | <input type="checkbox"/> |
| Further notes on the clinical findings:       |                          |                          |                                             |                                 |                          |                          |

## Medical tests

|                                                       | Not conducted            | Pending                  | Normal                   | Patho-logical            |
|-------------------------------------------------------|--------------------------|--------------------------|--------------------------|--------------------------|
| <b>Hearing test:</b>                                  | <input type="checkbox"/> | <input type="checkbox"/> | <input type="checkbox"/> | <input type="checkbox"/> |
| <b>Vision:</b> Vision test:                           | <input type="checkbox"/> | <input type="checkbox"/> | <input type="checkbox"/> | <input type="checkbox"/> |
| Color blindness:                                      | <input type="checkbox"/> | <input type="checkbox"/> | <input type="checkbox"/> | <input type="checkbox"/> |
| Stereo vision:                                        | <input type="checkbox"/> | <input type="checkbox"/> | <input type="checkbox"/> | <input type="checkbox"/> |
| <b>X-ray of thorax:</b> Indications for tuberculosis? | <input type="checkbox"/> | <input type="checkbox"/> | <input type="checkbox"/> | <input type="checkbox"/> |
| Where: [Name and address of medical facility]         |                          |                          |                          |                          |
| <b>Lab work:</b> Differential blood film:             | <input type="checkbox"/> | <input type="checkbox"/> | <input type="checkbox"/> | <input type="checkbox"/> |
| • Eosinophilia: /μl                                   | <input type="checkbox"/> | <input type="checkbox"/> | <input type="checkbox"/> | <input type="checkbox"/> |
| • Anemia:                                             | <input type="checkbox"/> | <input type="checkbox"/> | <input type="checkbox"/> | <input type="checkbox"/> |
| • Other:                                              | <input type="checkbox"/> | <input type="checkbox"/> | <input type="checkbox"/> | <input type="checkbox"/> |
| Quantiferon:                                          | <input type="checkbox"/> | <input type="checkbox"/> | <input type="checkbox"/> | <input type="checkbox"/> |
| HBs-Ag:                                               | <input type="checkbox"/> | <input type="checkbox"/> | <input type="checkbox"/> | <input type="checkbox"/> |
| HIV serology:                                         | <input type="checkbox"/> | <input type="checkbox"/> | <input type="checkbox"/> | <input type="checkbox"/> |
| Urine status:                                         | <input type="checkbox"/> | <input type="checkbox"/> | <input type="checkbox"/> | <input type="checkbox"/> |
| <b>Other medical tests:</b> [Description]             | <input type="checkbox"/> | <input type="checkbox"/> | <input type="checkbox"/> | <input type="checkbox"/> |
| Further notes on the medical tests:                   |                          |                          |                          |                          |

## Vaccinations

Vaccinations performed at the time of the present appointment:

☐ MMRV ☐ MMR ☐ Varicella ☐ Influenza ☐ dTap IPV ☐ dTap ☐ dT ☐ Other:

Next recommended vaccinations:

☐ MMRV ☐ MMR ☐ Varicella ☐ Influenza ☐ dTap IPV ☐ dTap ☐ dT ☐ Other:

**Diagnoses**

- [Enter description]

**Therapies**

- [Enter description]

**Summary**

In summary, we find the health status of [Patient name] to be: [enter brief text description].

Best regards,

[Name of physician]
